# Supplementary material
Source: ML conference proceedings conference paper supplement (https://openreview.net/forum?id=ukWZS73ccwk)
Supplement: supplementary_material [file attachment]

| Data         | Metric       | SaShiMi                 | LS4 (Ours)                              |
|--------------|--------------|-------------------------|-----------------------------------------|
| FRED-MD      | Marginal ↓   | $0.0642 \pm 0.0111$     | <b><math>0.0257 \pm 0.00829</math></b>  |
|              | Class. ↑     | $0.00533 \pm 0.00438$   | <b><math>1.21 \pm 0.0395</math></b>     |
|              | Prediction ↓ | $0.574 \pm 0.0277$      | <b><math>0.0316 \pm 0.0108</math></b>   |
| NN5 Daily    | Marginal ↓   | $0.0217 \pm 0.00507$    | <b><math>0.00733 \pm 0.00145</math></b> |
|              | Class. ↑     | $0.0288 \pm 0.0426$     | <b><math>0.938 \pm 0.183</math></b>     |
|              | Prediction ↓ | $1.84 \pm 0.493$        | <b><math>0.255 \pm 0.0637</math></b>    |
| Temp Rain    | Marginal ↓   | $0.762 \pm 0.00707$     | <b><math>0.0836 \pm 0.0119</math></b>   |
|              | Class. ↑     | $0.000168 \pm 0.000263$ | <b><math>0.975 \pm 0.273</math></b>     |
|              | Prediction ↓ | $2.44 \pm 0.0324$       | <b><math>0.427 \pm 0.0426</math></b>    |
| Solar Weekly | Marginal ↓   | $0.1454 \pm 0.00801$    | <b><math>0.0431 \pm 0.00627</math></b>  |
|              | Class. ↑     | $0.0134 \pm 0.00395$    | <b><math>0.750 \pm 0.188</math></b>     |
|              | Prediction ↓ | $0.418 \pm 0.0398$      | <b><math>0.135 \pm 0.0512</math></b>    |

Table 1: Runs with error bars. 5 trials are performed for each cell.
